# Supplementary material for: Zircon trace element evidence for early hydrothermal activity on Mars
Source: PubMed Central journal article supplement — Sci Adv. 2024 Nov 22;10(47):eadq3694. doi: 10.1126/sciadv.adq3694 (PMC11584009; doi:10.1126/sciadv.adq3694), 2024-11-22
Supplement: sciadv.adq3694_sm.pdf [file sciadv.adq3694_sm.pdf]

Supplementary Materials for  
**Zircon trace element evidence for early hydrothermal activity on Mars**

Jack Gillespie *et al.*

Corresponding author: Jack Gillespie, jack.gillespie@unil.ch

*Sci. Adv.* **10**, eadq3694 (2024)  
DOI: 10.1126/sciadv.adq3694

**This PDF file includes:**

Tables S1 and S2

| Cation       | EDS-STEM map area<br>Fig 2a |                  | EDS-STEM zircon non-<br>twin domain |                  |
|--------------|-----------------------------|------------------|-------------------------------------|------------------|
|              | At. %                       | Uncertainty<br>% | At. %                               | Uncertainty<br>% |
| Mg           | 0.00                        | 0.00             | 0.13                                | 0.02             |
| Al           | 0.34                        | 0.09             | 0.84                                | 0.23             |
| Si           | 46.55                       | 12.51            | 47.31                               | 12.64            |
| Fe           | 1.31                        | 0.30             | 0.96                                | 0.22             |
| Y            | 0.51                        | 0.11             | 0.49                                | 0.11             |
| Zr           | 50.12                       | 11.20            | 48.56                               | 10.76            |
| Hf           | 0.65                        | 0.14             | 1.01                                | 0.21             |
| <b>Total</b> | 99.48                       |                  | 99.17                               |                  |

**Table S1.**

Elemental composition of zircon in terms of atomic percent as determined by EDS-STEM analysis.

| Cluster no. | Si (at. %) | Zr (at. %) | O (at. %) | Fe (at. %) | Y (at. %) | Hf (at. %) | Al (at. %) | Mg (at. %) |
|-------------|------------|------------|-----------|------------|-----------|------------|------------|------------|
| Cluster 1   | 19.1       | 15.0       | 62.8      | 0.21       | 2.57      | 0.21       | 0.21       | 0.00       |
| Cluster 2   | 20.9       | 16.1       | 59.6      | 0.79       | 1.84      | 0.04       | 0.48       | 0.24       |
| Cluster 3   | 20.8       | 16.5       | 59.4      | 0.00       | 2.69      | 0.31       | 0.15       | 0.15       |
| Cluster 4   | 23.6       | 15.2       | 58.0      | 1.16       | 1.04      | 0.14       | 0.50       | 0.29       |
| Cluster 5   | 22.7       | 14.8       | 59.3      | 1.24       | 1.20      | 0.17       | 0.54       | 0.07       |
| Cluster 6   | 24.6       | 14.5       | 57.7      | 0.73       | 1.50      | 0.13       | 0.64       | 0.17       |
| Cluster 7   | 24.8       | 13.4       | 58.4      | 0.97       | 1.08      | 0.68       | 0.50       | 0.25       |
| Cluster 8   | 21.5       | 14.6       | 59.7      | 0.08       | 3.05      | 0.29       | 0.58       | 0.23       |
| Cluster 9   | 24.4       | 17.5       | 54.6      | 0.25       | 1.97      | 0.34       | 0.68       | 0.23       |
| Cluster 10  | 24.9       | 14.5       | 57.6      | 1.06       | 0.82      | 0.13       | 0.79       | 0.16       |
| Cluster 11  | 20.8       | 17.1       | 60.2      | 0.76       | 0.78      | 0.05       | 0.31       | 0.10       |
| Cluster 12  | 20.9       | 17.3       | 58.7      | 0.13       | 2.20      | 0.25       | 0.39       | 0.10       |
| Cluster 13  | 20.6       | 15.1       | 61.4      | 0.47       | 1.63      | 0.18       | 0.44       | 0.18       |
| Cluster 14  | 21.2       | 14.8       | 61.6      | 0.25       | 1.59      | 0.22       | 0.27       | 0.09       |
| Cluster 15  | 23.0       | 16.5       | 57.9      | 0.34       | 1.98      | 0.04       | 0.00       | 0.27       |
| Cluster 16  | 21.3       | 15.6       | 60.0      | 0.17       | 2.47      | 0.21       | 0.17       | 0.09       |
| Cluster 17  | 21.7       | 17.5       | 57.8      | 0.28       | 1.97      | 0.04       | 0.59       | 0.08       |
| Cluster 18  | 22.1       | 14.1       | 60.3      | 0.07       | 2.83      | 0.21       | 0.41       | 0.00       |
| Cluster 19  | 21.3       | 15.2       | 59.7      | 0.16       | 2.51      | 0.32       | 0.57       | 0.24       |
| Cluster 20  | 22.8       | 16.5       | 58.2      | 0.54       | 1.16      | 0.08       | 0.57       | 0.08       |
| Cluster 21  | 23.2       | 15.7       | 57.9      | 0.69       | 1.56      | 0.08       | 0.62       | 0.23       |
| Cluster 22  | 22.6       | 15.9       | 59.4      | 0.66       | 0.89      | 0.11       | 0.38       | 0.15       |
| Cluster 23  | 20.8       | 17.3       | 59.1      | 0.36       | 1.62      | 0.26       | 0.52       | 0.00       |
| Cluster 24  | 23.3       | 15.2       | 58.9      | 0.58       | 1.44      | 0.11       | 0.35       | 0.14       |
| Cluster 25  | 22.7       | 16.3       | 58.9      | 0.62       | 0.56      | 0.24       | 0.49       | 0.14       |
| Cluster 26  | 23.8       | 12.9       | 60.5      | 1.04       | 0.71      | 0.14       | 0.68       | 0.27       |
| Cluster 27  | 24.1       | 15.2       | 58.3      | 0.95       | 0.77      | 0.12       | 0.36       | 0.11       |
| Cluster 28  | 22.9       | 14.7       | 59.5      | 0.83       | 1.05      | 0.14       | 0.81       | 0.14       |
| Cluster 29  | 22.4       | 14.5       | 60.2      | 0.25       | 2.00      | 0.13       | 0.27       | 0.27       |
| Cluster 30  | 21.5       | 16.3       | 59.6      | 0.59       | 1.10      | 0.00       | 0.79       | 0.20       |
| Cluster 31  | 21.9       | 15.5       | 60.2      | 0.38       | 1.25      | 0.19       | 0.35       | 0.19       |
| Cluster 32  | 25.0       | 14.2       | 58.2      | 0.92       | 0.88      | 0.21       | 0.48       | 0.18       |
| Cluster 33  | 22.9       | 14.6       | 59.1      | 0.93       | 1.95      | 0.03       | 0.29       | 0.12       |
| Cluster 34  | 23.8       | 14.7       | 58.7      | 0.82       | 1.12      | 0.10       | 0.63       | 0.11       |
| Cluster 35  | 19.7       | 23.7       | 53.6      | 0.31       | 1.42      | 0.26       | 0.17       | 0.86       |
| Cluster 36  | 22.3       | 16.5       | 58.7      | 0.28       | 1.52      | 0.18       | 0.47       | 0.03       |
| Cluster 37  | 21.6       | 15.6       | 60.2      | 0.11       | 1.02      | 0.14       | 1.06       | 0.33       |
| Cluster 38  | 20.8       | 15.1       | 61.4      | 0.23       | 1.72      | 0.00       | 0.49       | 0.27       |
| Cluster 39  | 22.8       | 15.8       | 57.9      | 0.62       | 1.85      | 0.16       | 0.60       | 0.33       |
| Cluster 40  | 22.6       | 15.8       | 58.6      | 0.41       | 1.91      | 0.12       | 0.34       | 0.19       |
| Cluster 41  | 20.6       | 16.3       | 61.1      | 0.14       | 1.10      | 0.20       | 0.30       | 0.25       |
| Cluster 42  | 24.2       | 14.5       | 57.8      | 1.24       | 1.17      | 0.12       | 0.78       | 0.24       |

|            |      |      |      |      |      |      |      |      |
|------------|------|------|------|------|------|------|------|------|
| Cluster 43 | 22.5 | 15.3 | 59.6 | 0.38 | 1.71 | 0.14 | 0.18 | 0.18 |
| Cluster 44 | 21.4 | 16.4 | 60.2 | 0.47 | 1.12 | 0.04 | 0.31 | 0.09 |
| Cluster 45 | 22.3 | 16.3 | 59.4 | 0.60 | 0.95 | 0.04 | 0.40 | 0.09 |
| Cluster 46 | 21.8 | 14.7 | 60.4 | 0.85 | 1.31 | 0.10 | 0.50 | 0.29 |
| Cluster 47 | 23.1 | 16.4 | 58.1 | 0.75 | 0.74 | 0.15 | 0.59 | 0.17 |
| Cluster 48 | 23.4 | 16.3 | 57.2 | 0.87 | 1.29 | 0.10 | 0.78 | 0.16 |
| Cluster 49 | 21.3 | 16.7 | 59.7 | 0.12 | 1.20 | 0.13 | 0.57 | 0.24 |
| Cluster 50 | 23.8 | 15.0 | 58.5 | 0.47 | 1.33 | 0.16 | 0.54 | 0.23 |
| Cluster 51 | 23.0 | 15.6 | 59.2 | 0.51 | 1.13 | 0.06 | 0.38 | 0.04 |
| Cluster 52 | 22.6 | 16.0 | 58.1 | 0.55 | 2.09 | 0.15 | 0.34 | 0.23 |
| Cluster 53 | 21.2 | 15.5 | 60.0 | 0.49 | 1.86 | 0.23 | 0.39 | 0.39 |
| Cluster 54 | 21.5 | 17.3 | 59.5 | 0.12 | 1.23 | 0.09 | 0.32 | 0.07 |
| Cluster 55 | 23.2 | 16.2 | 58.1 | 0.69 | 1.27 | 0.11 | 0.29 | 0.14 |
| Cluster 56 | 25.4 | 15.0 | 56.9 | 0.79 | 1.23 | 0.12 | 0.36 | 0.18 |
| Cluster 57 | 23.5 | 15.1 | 59.2 | 0.70 | 0.92 | 0.08 | 0.47 | 0.17 |
| Cluster 58 | 25.6 | 14.9 | 56.5 | 1.14 | 1.03 | 0.13 | 0.63 | 0.13 |
| Cluster 59 | 22.4 | 15.9 | 58.4 | 0.23 | 2.43 | 0.09 | 0.35 | 0.16 |
| Cluster 60 | 24.7 | 15.1 | 57.4 | 0.82 | 0.95 | 0.09 | 0.61 | 0.25 |
| Cluster 61 | 22.9 | 16.6 | 58.5 | 0.53 | 0.78 | 0.16 | 0.45 | 0.10 |
| Cluster 62 | 23.6 | 15.9 | 57.6 | 0.89 | 1.22 | 0.13 | 0.48 | 0.20 |
| Cluster 63 | 24.7 | 14.2 | 56.8 | 1.69 | 1.40 | 0.27 | 0.60 | 0.39 |
| Cluster 64 | 21.9 | 16.8 | 59.3 | 0.61 | 0.91 | 0.14 | 0.30 | 0.07 |
| Cluster 65 | 23.6 | 14.7 | 59.1 | 0.83 | 1.13 | 0.08 | 0.34 | 0.18 |
| Cluster 66 | 24.3 | 14.4 | 57.8 | 1.17 | 1.41 | 0.08 | 0.59 | 0.22 |
| Cluster 67 | 24.2 | 15.8 | 57.5 | 0.99 | 0.78 | 0.11 | 0.57 | 0.13 |
| Cluster 68 | 24.9 | 14.0 | 58.0 | 1.33 | 0.81 | 0.07 | 0.58 | 0.37 |
| Cluster 69 | 24.0 | 15.4 | 58.0 | 0.93 | 0.67 | 0.12 | 0.72 | 0.16 |
| Cluster 70 | 24.0 | 16.6 | 57.0 | 1.03 | 0.74 | 0.12 | 0.32 | 0.21 |
| Cluster 71 | 21.2 | 15.4 | 61.0 | 0.17 | 1.26 | 0.11 | 0.52 | 0.28 |
| Cluster 72 | 22.8 | 16.3 | 58.7 | 0.56 | 0.82 | 0.12 | 0.51 | 0.09 |
| Cluster 73 | 25.2 | 15.7 | 55.8 | 2.10 | 0.46 | 0.13 | 0.57 | 0.15 |
| Cluster 74 | 23.9 | 15.4 | 57.6 | 1.22 | 0.39 | 0.06 | 0.93 | 0.58 |
| Cluster 75 | 20.8 | 17.3 | 58.5 | 0.16 | 2.76 | 0.08 | 0.16 | 0.32 |
| Cluster 76 | 22.0 | 15.6 | 59.2 | 0.20 | 1.82 | 0.18 | 0.73 | 0.24 |
| Cluster 77 | 25.5 | 16.5 | 55.1 | 1.25 | 0.90 | 0.29 | 0.23 | 0.23 |
| Cluster 78 | 23.3 | 15.5 | 58.6 | 0.70 | 1.56 | 0.07 | 0.21 | 0.07 |
| Cluster 79 | 21.6 | 17.0 | 58.2 | 0.53 | 1.59 | 0.32 | 0.55 | 0.18 |
| Cluster 80 | 22.0 | 16.6 | 59.4 | 0.57 | 1.06 | 0.04 | 0.26 | 0.09 |
| Cluster 81 | 18.6 | 19.0 | 59.6 | 0.31 | 2.07 | 0.08 | 0.33 | 0.00 |
| Cluster 82 | 23.0 | 16.5 | 57.8 | 0.87 | 1.04 | 0.08 | 0.42 | 0.34 |
| Cluster 83 | 24.1 | 16.4 | 57.1 | 0.46 | 1.30 | 0.08 | 0.49 | 0.00 |
| Cluster 84 | 23.2 | 15.3 | 59.3 | 0.29 | 0.87 | 0.12 | 0.64 | 0.16 |
| Cluster 85 | 25.3 | 15.4 | 56.4 | 1.28 | 0.72 | 0.12 | 0.59 | 0.28 |
| Cluster 86 | 19.7 | 17.8 | 60.0 | 0.19 | 1.76 | 0.04 | 0.54 | 0.00 |

|             |      |      |      |      |      |      |      |      |
|-------------|------|------|------|------|------|------|------|------|
| Cluster 87  | 22.7 | 17.4 | 57.2 | 0.74 | 1.51 | 0.08 | 0.38 | 0.08 |
| Cluster 88  | 23.1 | 16.4 | 57.7 | 0.46 | 1.63 | 0.00 | 0.42 | 0.28 |
| Cluster 89  | 18.6 | 17.5 | 60.0 | 0.09 | 2.99 | 0.14 | 0.41 | 0.27 |
| Cluster 90  | 23.9 | 16.3 | 56.9 | 0.83 | 1.04 | 0.17 | 0.70 | 0.08 |
| Cluster 91  | 21.9 | 13.8 | 61.1 | 0.63 | 1.55 | 0.06 | 0.52 | 0.39 |
| Cluster 92  | 23.7 | 14.9 | 58.5 | 0.67 | 1.35 | 0.12 | 0.80 | 0.06 |
| Cluster 93  | 22.0 | 14.6 | 60.6 | 0.10 | 2.21 | 0.06 | 0.24 | 0.12 |
| Cluster 94  | 21.0 | 18.0 | 59.4 | 0.11 | 1.12 | 0.09 | 0.18 | 0.06 |
| Cluster 95  | 22.6 | 16.2 | 57.7 | 0.69 | 2.20 | 0.23 | 0.35 | 0.00 |
| Cluster 96  | 21.9 | 15.3 | 60.1 | 0.52 | 1.45 | 0.17 | 0.46 | 0.17 |
| Cluster 97  | 25.0 | 15.0 | 57.3 | 0.73 | 1.17 | 0.00 | 0.68 | 0.11 |
| Cluster 98  | 21.9 | 15.3 | 59.7 | 0.19 | 2.25 | 0.15 | 0.20 | 0.31 |
| Cluster 99  | 22.2 | 16.1 | 58.9 | 1.07 | 1.52 | 0.05 | 0.20 | 0.00 |
| Cluster 100 | 19.9 | 16.9 | 60.4 | 0.16 | 1.76 | 0.20 | 0.51 | 0.15 |
| Cluster 101 | 24.9 | 15.2 | 57.1 | 0.78 | 1.47 | 0.10 | 0.30 | 0.10 |
| Cluster 102 | 22.5 | 16.7 | 58.8 | 0.13 | 0.93 | 0.15 | 0.56 | 0.23 |
| Cluster 103 | 20.3 | 14.3 | 60.6 | 0.24 | 3.02 | 0.19 | 0.38 | 0.95 |
| Cluster 104 | 23.2 | 17.2 | 56.9 | 0.77 | 1.10 | 0.10 | 0.39 | 0.39 |
| Cluster 105 | 22.5 | 15.6 | 58.3 | 0.17 | 2.64 | 0.00 | 0.28 | 0.47 |
| Cluster 106 | 21.8 | 15.2 | 60.2 | 0.29 | 1.91 | 0.05 | 0.37 | 0.18 |
| Cluster 107 | 23.9 | 14.0 | 59.1 | 0.64 | 1.44 | 0.14 | 0.73 | 0.09 |
| Cluster 108 | 22.4 | 16.3 | 58.0 | 0.20 | 2.38 | 0.13 | 0.43 | 0.09 |
| Cluster 109 | 21.3 | 15.0 | 60.1 | 0.31 | 2.02 | 0.08 | 0.49 | 0.73 |
| Cluster 110 | 23.3 | 15.6 | 58.3 | 0.65 | 1.28 | 0.12 | 0.55 | 0.31 |
| Cluster 111 | 22.9 | 16.2 | 58.3 | 0.81 | 1.31 | 0.08 | 0.23 | 0.15 |
| Cluster 112 | 23.9 | 15.5 | 57.9 | 1.10 | 0.88 | 0.09 | 0.48 | 0.26 |
| Cluster 113 | 23.7 | 15.5 | 58.1 | 0.68 | 1.19 | 0.15 | 0.51 | 0.22 |
| Cluster 114 | 20.3 | 16.5 | 60.7 | 0.33 | 1.41 | 0.04 | 0.36 | 0.29 |
| Cluster 115 | 21.3 | 15.0 | 60.7 | 0.10 | 1.62 | 0.15 | 0.96 | 0.22 |
| Cluster 116 | 23.7 | 14.7 | 58.9 | 0.81 | 1.46 | 0.07 | 0.36 | 0.00 |
| Cluster 117 | 24.4 | 15.2 | 57.4 | 1.07 | 0.94 | 0.11 | 0.71 | 0.14 |
| Cluster 118 | 22.8 | 15.0 | 60.0 | 0.96 | 0.96 | 0.14 | 0.07 | 0.21 |
| Cluster 119 | 21.5 | 15.2 | 60.4 | 0.95 | 1.32 | 0.23 | 0.39 | 0.06 |
| Cluster 120 | 22.1 | 14.6 | 60.1 | 0.62 | 1.76 | 0.29 | 0.46 | 0.07 |
| Cluster 121 | 22.0 | 16.6 | 59.6 | 0.41 | 0.67 | 0.19 | 0.58 | 0.00 |
| Cluster 122 | 23.1 | 15.5 | 58.7 | 1.04 | 0.71 | 0.06 | 0.71 | 0.13 |
| Cluster 123 | 22.4 | 17.1 | 58.0 | 0.55 | 1.23 | 0.09 | 0.53 | 0.12 |
| Cluster 124 | 23.2 | 14.9 | 59.0 | 0.83 | 1.19 | 0.13 | 0.64 | 0.20 |
| Cluster 125 | 22.9 | 16.4 | 58.0 | 0.71 | 1.28 | 0.14 | 0.35 | 0.17 |
| Cluster 126 | 24.6 | 14.4 | 58.1 | 0.62 | 1.26 | 0.25 | 0.68 | 0.17 |
| Cluster 127 | 22.4 | 15.2 | 59.1 | 0.65 | 1.58 | 0.14 | 0.34 | 0.56 |
| Cluster 128 | 23.9 | 16.9 | 56.1 | 0.87 | 1.02 | 0.21 | 0.72 | 0.41 |
| Cluster 129 | 24.3 | 14.1 | 58.4 | 1.15 | 1.04 | 0.11 | 0.66 | 0.27 |
| Cluster 130 | 22.1 | 16.2 | 59.6 | 0.07 | 1.24 | 0.11 | 0.48 | 0.21 |

|             |      |      |      |      |      |      |      |      |
|-------------|------|------|------|------|------|------|------|------|
| Cluster 131 | 21.7 | 15.9 | 59.9 | 0.16 | 1.21 | 0.15 | 0.75 | 0.20 |
| Cluster 132 | 23.4 | 17.9 | 56.1 | 0.37 | 1.68 | 0.25 | 0.29 | 0.10 |
| Cluster 133 | 21.4 | 17.8 | 58.8 | 0.15 | 1.22 | 0.13 | 0.44 | 0.10 |
| Cluster 134 | 24.3 | 15.1 | 57.8 | 0.93 | 0.93 | 0.07 | 0.68 | 0.18 |
| Cluster 135 | 25.1 | 14.8 | 56.9 | 1.12 | 1.24 | 0.11 | 0.53 | 0.18 |
| Cluster 136 | 25.1 | 13.2 | 58.7 | 0.63 | 1.39 | 0.13 | 0.65 | 0.17 |
| Cluster 137 | 24.0 | 15.0 | 57.7 | 0.56 | 1.78 | 0.19 | 0.34 | 0.38 |
| Cluster 138 | 21.9 | 15.1 | 59.7 | 0.38 | 1.72 | 0.06 | 0.85 | 0.32 |
| Cluster 139 | 23.5 | 15.0 | 58.8 | 0.89 | 0.84 | 0.12 | 0.59 | 0.20 |
| Cluster 140 | 22.3 | 14.9 | 60.3 | 0.53 | 1.04 | 0.20 | 0.59 | 0.12 |
| Cluster 141 | 23.1 | 15.4 | 58.7 | 1.08 | 0.73 | 0.19 | 0.65 | 0.15 |
| Cluster 142 | 24.2 | 15.1 | 57.2 | 1.22 | 1.61 | 0.08 | 0.27 | 0.34 |
| Cluster 143 | 23.4 | 15.7 | 58.2 | 0.87 | 1.13 | 0.11 | 0.48 | 0.15 |
| Cluster 144 | 24.0 | 16.1 | 56.9 | 0.94 | 1.22 | 0.20 | 0.58 | 0.15 |
| Cluster 145 | 22.6 | 15.8 | 59.1 | 0.62 | 0.98 | 0.16 | 0.54 | 0.14 |
| Cluster 146 | 21.3 | 16.2 | 60.1 | 0.39 | 1.54 | 0.14 | 0.24 | 0.17 |
| Cluster 147 | 21.5 | 14.5 | 61.5 | 0.16 | 1.47 | 0.08 | 0.58 | 0.27 |
| Cluster 148 | 20.4 | 17.2 | 60.5 | 0.12 | 1.26 | 0.15 | 0.43 | 0.07 |
| Cluster 149 | 22.9 | 16.1 | 57.8 | 1.05 | 1.20 | 0.16 | 0.63 | 0.14 |
| Cluster 150 | 20.1 | 17.5 | 60.8 | 0.08 | 1.21 | 0.14 | 0.11 | 0.07 |
| Cluster 151 | 21.7 | 16.1 | 60.3 | 0.17 | 1.12 | 0.14 | 0.43 | 0.07 |
| Cluster 152 | 20.6 | 16.8 | 58.5 | 0.26 | 3.37 | 0.26 | 0.26 | 0.00 |
| Cluster 153 | 21.7 | 15.1 | 59.9 | 0.37 | 2.28 | 0.20 | 0.40 | 0.00 |
| Cluster 154 | 19.2 | 16.7 | 61.0 | 0.31 | 2.26 | 0.20 | 0.13 | 0.13 |
| Cluster 155 | 18.8 | 15.9 | 62.4 | 0.10 | 2.80 | 0.00 | 0.00 | 0.00 |
| Cluster 156 | 26.2 | 14.4 | 56.1 | 0.43 | 1.20 | 0.10 | 1.40 | 0.20 |
| Cluster 157 | 22.1 | 15.5 | 59.6 | 0.40 | 1.95 | 0.12 | 0.24 | 0.12 |
| Cluster 158 | 23.9 | 16.7 | 56.2 | 0.87 | 1.21 | 0.35 | 0.35 | 0.46 |
| Cluster 159 | 24.0 | 15.4 | 57.9 | 0.73 | 1.27 | 0.17 | 0.34 | 0.25 |
| Cluster 160 | 25.4 | 14.3 | 57.3 | 1.05 | 1.49 | 0.17 | 0.33 | 0.00 |
| Cluster 161 | 24.9 | 16.0 | 56.4 | 0.72 | 0.99 | 0.10 | 0.72 | 0.26 |
| Cluster 162 | 20.7 | 16.7 | 59.7 | 0.38 | 1.66 | 0.16 | 0.54 | 0.22 |
| Cluster 163 | 23.3 | 14.8 | 59.0 | 0.35 | 1.62 | 0.08 | 0.65 | 0.16 |
| Cluster 164 | 22.2 | 13.2 | 60.6 | 0.32 | 2.13 | 0.22 | 0.60 | 0.60 |
| Cluster 165 | 22.4 | 15.9 | 58.5 | 1.14 | 1.40 | 0.14 | 0.55 | 0.00 |
| Cluster 166 | 21.8 | 14.2 | 60.4 | 0.54 | 2.16 | 0.13 | 0.81 | 0.00 |
| Cluster 167 | 18.7 | 14.5 | 62.4 | 0.22 | 2.91 | 0.00 | 1.06 | 0.26 |
| Cluster 168 | 21.6 | 15.1 | 61.1 | 0.32 | 1.51 | 0.00 | 0.26 | 0.13 |
| Cluster 169 | 20.1 | 14.8 | 61.5 | 0.10 | 2.33 | 0.21 | 0.42 | 0.42 |
| Cluster 170 | 21.6 | 16.8 | 58.3 | 0.19 | 2.36 | 0.00 | 0.25 | 0.50 |
| Cluster 171 | 23.7 | 14.6 | 59.0 | 0.62 | 1.45 | 0.06 | 0.49 | 0.12 |
| Cluster 172 | 21.6 | 15.2 | 60.4 | 0.86 | 1.24 | 0.09 | 0.42 | 0.12 |
| Cluster 173 | 19.7 | 16.7 | 60.8 | 0.26 | 1.58 | 0.23 | 0.68 | 0.00 |
| Cluster 174 | 21.8 | 16.7 | 59.0 | 0.44 | 1.33 | 0.11 | 0.55 | 0.00 |

|             |      |      |      |      |      |      |      |      |
|-------------|------|------|------|------|------|------|------|------|
| Cluster 175 | 23.1 | 14.6 | 59.5 | 0.82 | 1.05 | 0.11 | 0.63 | 0.21 |
| Cluster 176 | 17.8 | 14.9 | 63.2 | 0.34 | 2.66 | 0.61 | 0.61 | 0.00 |
| Cluster 177 | 20.9 | 15.0 | 60.8 | 0.20 | 2.85 | 0.10 | 0.20 | 0.00 |
| Cluster 178 | 22.0 | 17.3 | 57.9 | 0.30 | 2.41 | 0.10 | 0.00 | 0.00 |
| Cluster 179 | 21.6 | 17.3 | 58.5 | 0.42 | 1.55 | 0.20 | 0.39 | 0.10 |
| Cluster 180 | 26.1 | 14.8 | 56.8 | 0.82 | 0.69 | 0.10 | 0.78 | 0.00 |
| Cluster 181 | 22.2 | 16.2 | 58.7 | 0.80 | 1.51 | 0.16 | 0.39 | 0.06 |
| Cluster 182 | 20.9 | 15.9 | 59.9 | 0.83 | 1.89 | 0.14 | 0.29 | 0.19 |
| Cluster 183 | 21.3 | 14.1 | 61.5 | 1.37 | 0.54 | 0.36 | 0.89 | 0.00 |
| Cluster 184 | 23.2 | 14.2 | 59.4 | 0.56 | 1.84 | 0.09 | 0.18 | 0.53 |
| Cluster 185 | 23.3 | 15.9 | 57.6 | 0.97 | 1.36 | 0.26 | 0.35 | 0.26 |
| Cluster 186 | 21.4 | 15.2 | 59.8 | 0.12 | 2.44 | 0.22 | 0.35 | 0.44 |
| Cluster 187 | 20.8 | 16.0 | 60.2 | 0.52 | 1.46 | 0.26 | 0.69 | 0.00 |
| Cluster 188 | 20.4 | 15.8 | 61.2 | 0.17 | 2.06 | 0.00 | 0.17 | 0.17 |
| Cluster 189 | 21.9 | 14.7 | 59.4 | 0.11 | 2.41 | 0.41 | 0.73 | 0.41 |
| Cluster 190 | 24.8 | 14.7 | 57.3 | 1.43 | 1.24 | 0.16 | 0.32 | 0.11 |
| Cluster 191 | 23.6 | 15.8 | 57.3 | 0.93 | 1.75 | 0.08 | 0.36 | 0.21 |
| Cluster 192 | 21.2 | 16.9 | 60.1 | 0.16 | 0.97 | 0.17 | 0.41 | 0.09 |
| Cluster 193 | 21.9 | 14.4 | 60.7 | 0.17 | 2.40 | 0.07 | 0.34 | 0.05 |
| Cluster 194 | 23.8 | 14.7 | 58.2 | 0.97 | 1.74 | 0.10 | 0.30 | 0.18 |
| Cluster 195 | 20.4 | 16.9 | 60.4 | 0.44 | 1.04 | 0.00 | 0.74 | 0.00 |
| Cluster 196 | 24.0 | 13.7 | 59.2 | 0.80 | 0.98 | 0.07 | 0.88 | 0.39 |
| Cluster 197 | 27.0 | 16.3 | 54.3 | 0.36 | 1.42 | 0.29 | 0.29 | 0.14 |
| Cluster 198 | 24.1 | 13.6 | 60.2 | 0.75 | 0.65 | 0.04 | 0.58 | 0.07 |
| Cluster 199 | 23.0 | 12.8 | 60.3 | 1.19 | 1.06 | 0.21 | 0.86 | 0.57 |
| Cluster 200 | 21.4 | 16.2 | 58.7 | 0.26 | 3.14 | 0.14 | 0.00 | 0.14 |
| Cluster 201 | 23.7 | 14.9 | 58.2 | 0.65 | 1.70 | 0.09 | 0.42 | 0.37 |
| Cluster 202 | 23.5 | 14.7 | 58.5 | 0.50 | 2.30 | 0.00 | 0.55 | 0.00 |
| Cluster 203 | 26.0 | 14.9 | 56.5 | 0.63 | 1.12 | 0.07 | 0.84 | 0.00 |
| Cluster 204 | 21.8 | 14.5 | 60.6 | 0.27 | 2.21 | 0.27 | 0.40 | 0.00 |
| Cluster 205 | 22.7 | 15.2 | 58.4 | 0.89 | 1.31 | 0.17 | 0.87 | 0.47 |
| Cluster 206 | 23.4 | 16.6 | 57.0 | 0.36 | 1.96 | 0.20 | 0.41 | 0.14 |
| Cluster 207 | 24.0 | 15.1 | 58.6 | 0.81 | 0.90 | 0.26 | 0.40 | 0.00 |
| Cluster 208 | 23.6 | 15.3 | 57.6 | 1.32 | 0.93 | 0.13 | 0.68 | 0.39 |
| Cluster 209 | 23.6 | 15.2 | 58.3 | 1.08 | 1.15 | 0.13 | 0.35 | 0.16 |
| Cluster 210 | 22.5 | 16.1 | 58.4 | 0.41 | 2.08 | 0.13 | 0.32 | 0.06 |
| Cluster 211 | 22.9 | 14.9 | 58.4 | 0.23 | 2.63 | 0.19 | 0.38 | 0.38 |
| Cluster 212 | 22.8 | 14.5 | 58.6 | 0.20 | 2.96 | 0.24 | 0.36 | 0.24 |
| Cluster 213 | 23.5 | 14.3 | 59.0 | 1.18 | 1.20 | 0.16 | 0.51 | 0.12 |
| Cluster 214 | 20.0 | 15.5 | 60.3 | 0.31 | 2.72 | 0.17 | 0.35 | 0.58 |
| Cluster 215 | 23.6 | 15.0 | 58.9 | 1.10 | 0.94 | 0.09 | 0.17 | 0.17 |
| Cluster 216 | 22.3 | 16.9 | 58.1 | 0.41 | 1.46 | 0.00 | 0.79 | 0.00 |
| Cluster 217 | 22.3 | 16.2 | 58.5 | 0.54 | 1.67 | 0.19 | 0.44 | 0.11 |
| Cluster 218 | 20.1 | 16.2 | 60.1 | 0.19 | 2.91 | 0.21 | 0.21 | 0.10 |

|             |      |      |      |      |      |      |      |      |
|-------------|------|------|------|------|------|------|------|------|
| Cluster 219 | 21.3 | 15.1 | 61.0 | 0.12 | 1.35 | 0.10 | 0.63 | 0.45 |
| Cluster 220 | 20.2 | 16.6 | 59.9 | 0.11 | 2.57 | 0.13 | 0.21 | 0.31 |
| Cluster 221 | 24.4 | 14.2 | 58.6 | 0.20 | 1.62 | 0.10 | 0.30 | 0.51 |
| Cluster 222 | 22.9 | 15.9 | 59.1 | 0.33 | 1.20 | 0.10 | 0.10 | 0.30 |
| Cluster 223 | 25.0 | 13.4 | 59.3 | 0.73 | 0.81 | 0.10 | 0.39 | 0.29 |
| Cluster 224 | 24.7 | 13.8 | 58.3 | 1.10 | 1.19 | 0.19 | 0.56 | 0.19 |
| Cluster 225 | 23.7 | 15.0 | 58.5 | 0.76 | 1.52 | 0.14 | 0.18 | 0.23 |
| Cluster 226 | 22.7 | 15.4 | 59.3 | 0.11 | 1.67 | 0.00 | 0.65 | 0.19 |
| Cluster 227 | 19.6 | 15.5 | 62.2 | 0.18 | 1.86 | 0.09 | 0.27 | 0.27 |
| Cluster 228 | 20.2 | 15.9 | 60.7 | 0.03 | 2.83 | 0.09 | 0.09 | 0.17 |
| Cluster 229 | 24.1 | 16.6 | 56.6 | 0.75 | 1.05 | 0.21 | 0.68 | 0.08 |
| Cluster 230 | 23.5 | 16.4 | 57.3 | 0.64 | 1.61 | 0.04 | 0.49 | 0.00 |
| Cluster 231 | 20.5 | 17.1 | 59.7 | 0.41 | 1.76 | 0.12 | 0.33 | 0.00 |
| Cluster 232 | 25.4 | 13.1 | 58.5 | 0.63 | 1.50 | 0.12 | 0.44 | 0.32 |
| Cluster 233 | 21.2 | 16.1 | 59.1 | 0.07 | 2.53 | 0.20 | 0.79 | 0.00 |
| Cluster 234 | 22.3 | 14.7 | 59.8 | 0.83 | 1.68 | 0.12 | 0.42 | 0.19 |
| Cluster 235 | 21.1 | 15.6 | 60.2 | 0.15 | 2.46 | 0.15 | 0.23 | 0.15 |
| Cluster 236 | 22.2 | 14.7 | 60.1 | 0.15 | 2.18 | 0.18 | 0.21 | 0.28 |
| Cluster 237 | 21.6 | 15.6 | 59.9 | 0.73 | 1.53 | 0.10 | 0.38 | 0.14 |
| Cluster 238 | 20.5 | 18.1 | 58.9 | 0.27 | 0.95 | 0.24 | 0.69 | 0.27 |
| Cluster 239 | 21.2 | 16.4 | 59.4 | 0.49 | 1.96 | 0.16 | 0.20 | 0.20 |
| Cluster 240 | 22.0 | 15.3 | 60.0 | 0.80 | 1.04 | 0.20 | 0.59 | 0.20 |
| Cluster 241 | 21.8 | 16.4 | 59.4 | 0.16 | 1.35 | 0.08 | 0.48 | 0.35 |
| Cluster 242 | 22.4 | 16.1 | 58.7 | 0.70 | 1.40 | 0.10 | 0.52 | 0.13 |
| Cluster 243 | 22.2 | 15.7 | 58.7 | 0.08 | 2.39 | 0.16 | 0.57 | 0.13 |
| Cluster 244 | 24.8 | 15.0 | 57.0 | 1.23 | 0.91 | 0.20 | 0.71 | 0.16 |
| Cluster 245 | 23.0 | 14.4 | 59.9 | 0.48 | 1.08 | 0.24 | 0.67 | 0.30 |
| Cluster 246 | 19.6 | 17.2 | 61.6 | 0.37 | 0.89 | 0.18 | 0.12 | 0.06 |
| Cluster 247 | 23.6 | 16.5 | 57.0 | 0.51 | 1.48 | 0.08 | 0.68 | 0.17 |
| Cluster 248 | 21.5 | 17.4 | 59.3 | 0.13 | 0.96 | 0.14 | 0.36 | 0.17 |
| Cluster 249 | 22.6 | 15.8 | 58.6 | 0.66 | 1.50 | 0.11 | 0.60 | 0.11 |
| Cluster 250 | 22.6 | 15.1 | 59.2 | 0.87 | 1.33 | 0.10 | 0.66 | 0.15 |
| Cluster 251 | 25.0 | 14.7 | 57.5 | 1.16 | 0.73 | 0.13 | 0.76 | 0.05 |
| Cluster 252 | 24.2 | 14.7 | 58.4 | 0.41 | 1.57 | 0.15 | 0.35 | 0.20 |
| Cluster 253 | 22.9 | 15.5 | 58.6 | 0.73 | 1.36 | 0.23 | 0.38 | 0.34 |
| Cluster 254 | 23.4 | 14.9 | 58.9 | 1.31 | 0.74 | 0.10 | 0.49 | 0.08 |
| Cluster 255 | 23.5 | 14.1 | 59.6 | 0.66 | 1.40 | 0.13 | 0.40 | 0.17 |
| Cluster 256 | 20.6 | 16.3 | 59.5 | 0.12 | 3.27 | 0.00 | 0.18 | 0.00 |
| Cluster 257 | 22.2 | 13.5 | 60.4 | 1.34 | 0.64 | 0.08 | 0.97 | 0.81 |
| Cluster 258 | 20.9 | 13.3 | 61.8 | 0.30 | 3.29 | 0.30 | 0.15 | 0.00 |
| Cluster 259 | 18.5 | 16.5 | 61.8 | 0.20 | 2.63 | 0.00 | 0.30 | 0.00 |
| Cluster 260 | 22.2 | 14.7 | 60.2 | 0.55 | 1.71 | 0.15 | 0.29 | 0.15 |
| Cluster 261 | 21.8 | 18.0 | 56.9 | 0.73 | 1.56 | 0.14 | 0.43 | 0.43 |
| Cluster 262 | 23.9 | 13.6 | 60.1 | 0.69 | 1.25 | 0.14 | 0.42 | 0.00 |



|             |      |      |      |      |      |      |      |      |
|-------------|------|------|------|------|------|------|------|------|
| Cluster 263 | 23.0 | 16.7 | 57.5 | 0.65 | 1.13 | 0.07 | 0.81 | 0.13 |
| Cluster 264 | 21.9 | 16.0 | 58.9 | 1.01 | 1.30 | 0.10 | 0.59 | 0.26 |
| Cluster 265 | 22.2 | 17.4 | 56.8 | 0.14 | 2.46 | 0.06 | 0.24 | 0.72 |
| Cluster 266 | 23.7 | 15.0 | 58.8 | 1.07 | 0.83 | 0.06 | 0.48 | 0.12 |
| Cluster 267 | 24.9 | 12.9 | 58.6 | 0.95 | 1.59 | 0.06 | 0.83 | 0.12 |
| Cluster 268 | 22.0 | 16.6 | 58.6 | 0.10 | 1.17 | 0.18 | 1.19 | 0.12 |
| Cluster 269 | 21.0 | 16.3 | 59.8 | 0.11 | 1.41 | 0.34 | 0.80 | 0.23 |
| Cluster 270 | 23.4 | 16.7 | 57.1 | 0.92 | 0.98 | 0.10 | 0.73 | 0.00 |
| Cluster 271 | 22.9 | 14.5 | 60.3 | 0.26 | 0.88 | 0.05 | 0.98 | 0.10 |
| Cluster 272 | 23.9 | 14.5 | 58.8 | 0.51 | 1.82 | 0.05 | 0.27 | 0.18 |
| Cluster 273 | 23.5 | 14.3 | 58.8 | 0.22 | 2.14 | 0.12 | 0.62 | 0.23 |
| Cluster 274 | 23.2 | 13.9 | 60.1 | 0.81 | 1.48 | 0.00 | 0.37 | 0.15 |
| Cluster 275 | 22.7 | 15.1 | 59.5 | 0.20 | 1.96 | 0.11 | 0.29 | 0.15 |
| Cluster 276 | 25.2 | 14.9 | 57.4 | 0.71 | 0.97 | 0.17 | 0.56 | 0.07 |
| Cluster 277 | 21.7 | 16.4 | 59.5 | 0.39 | 1.36 | 0.15 | 0.47 | 0.06 |
| Cluster 278 | 22.8 | 15.0 | 58.3 | 0.14 | 2.64 | 0.08 | 0.31 | 0.73 |
| Cluster 279 | 22.8 | 13.4 | 60.0 | 0.74 | 2.20 | 0.18 | 0.35 | 0.35 |
| Cluster 280 | 18.1 | 16.5 | 61.8 | 0.04 | 3.07 | 0.18 | 0.24 | 0.12 |
| Cluster 281 | 21.8 | 14.5 | 60.4 | 0.05 | 2.15 | 0.05 | 0.38 | 0.58 |
| Cluster 282 | 22.6 | 15.8 | 59.6 | 1.07 | 0.45 | 0.22 | 0.30 | 0.00 |
| Cluster 283 | 20.3 | 15.2 | 61.6 | 0.47 | 1.78 | 0.19 | 0.50 | 0.00 |
| Cluster 284 | 21.9 | 16.2 | 59.4 | 0.38 | 1.19 | 0.00 | 0.69 | 0.23 |
| Cluster 285 | 23.9 | 16.3 | 57.1 | 0.96 | 1.40 | 0.10 | 0.21 | 0.10 |
| Cluster 286 | 23.6 | 14.7 | 59.0 | 0.74 | 1.28 | 0.10 | 0.62 | 0.00 |
| Cluster 287 | 21.9 | 15.9 | 59.2 | 0.82 | 1.11 | 0.21 | 0.51 | 0.34 |
| Cluster 288 | 21.4 | 15.2 | 60.3 | 0.11 | 2.39 | 0.04 | 0.08 | 0.49 |
| Cluster 289 | 22.6 | 14.7 | 59.7 | 0.65 | 1.73 | 0.23 | 0.39 | 0.00 |
| Cluster 290 | 19.4 | 16.1 | 61.8 | 0.09 | 2.39 | 0.07 | 0.15 | 0.00 |
| Cluster 291 | 23.5 | 14.4 | 59.1 | 0.57 | 1.23 | 0.14 | 0.72 | 0.29 |
| Cluster 292 | 21.9 | 14.4 | 60.9 | 1.07 | 1.11 | 0.07 | 0.47 | 0.07 |
| Cluster 293 | 22.4 | 14.0 | 59.6 | 0.51 | 2.23 | 0.20 | 0.60 | 0.40 |
| Cluster 294 | 24.0 | 13.4 | 59.2 | 0.21 | 2.23 | 0.10 | 0.62 | 0.31 |
| Cluster 295 | 17.9 | 16.5 | 62.4 | 0.54 | 2.37 | 0.00 | 0.22 | 0.00 |
| Cluster 296 | 17.8 | 16.7 | 62.2 | 0.20 | 2.81 | 0.10 | 0.20 | 0.00 |
| Cluster 297 | 24.2 | 16.3 | 56.1 | 0.42 | 1.73 | 0.00 | 0.85 | 0.34 |
| Cluster 298 | 21.0 | 16.6 | 59.3 | 0.38 | 2.04 | 0.19 | 0.38 | 0.13 |
| Cluster 299 | 20.9 | 15.9 | 60.2 | 0.24 | 2.34 | 0.06 | 0.12 | 0.35 |
| Cluster 300 | 20.5 | 15.0 | 61.2 | 0.26 | 1.94 | 0.17 | 0.90 | 0.11 |
| Cluster 301 | 22.6 | 15.4 | 59.5 | 0.25 | 1.80 | 0.09 | 0.26 | 0.17 |
| Cluster 302 | 22.7 | 15.6 | 59.2 | 0.56 | 1.11 | 0.12 | 0.40 | 0.32 |
| Cluster 303 | 23.1 | 15.9 | 58.6 | 1.13 | 0.99 | 0.00 | 0.33 | 0.00 |
| Cluster 304 | 24.2 | 11.2 | 61.8 | 0.90 | 1.41 | 0.17 | 0.34 | 0.00 |
| Cluster 305 | 25.0 | 13.7 | 58.0 | 0.71 | 1.77 | 0.18 | 0.35 | 0.24 |
| Cluster 306 | 24.4 | 14.7 | 58.2 | 0.70 | 1.48 | 0.06 | 0.34 | 0.11 |

|             |      |      |      |      |      |      |      |      |
|-------------|------|------|------|------|------|------|------|------|
| Cluster 307 | 22.1 | 16.5 | 59.0 | 0.55 | 1.35 | 0.00 | 0.30 | 0.15 |
| Cluster 308 | 22.0 | 14.8 | 60.9 | 0.35 | 1.51 | 0.06 | 0.35 | 0.00 |
| Cluster 309 | 23.0 | 13.8 | 59.2 | 0.43 | 3.19 | 0.20 | 0.20 | 0.00 |
| Cluster 310 | 22.5 | 17.7 | 57.4 | 0.26 | 1.37 | 0.09 | 0.68 | 0.00 |
| Cluster 311 | 20.2 | 16.0 | 60.1 | 0.29 | 2.49 | 0.00 | 0.81 | 0.14 |
| Cluster 312 | 20.8 | 17.0 | 58.6 | 0.24 | 2.08 | 0.13 | 0.52 | 0.65 |
| Cluster 313 | 22.3 | 13.7 | 60.3 | 0.19 | 2.76 | 0.48 | 0.19 | 0.00 |
| Cluster 314 | 22.3 | 14.3 | 60.0 | 0.21 | 2.66 | 0.00 | 0.47 | 0.00 |
| Cluster 315 | 20.9 | 17.2 | 59.5 | 0.14 | 1.65 | 0.14 | 0.43 | 0.00 |
| Cluster 316 | 20.3 | 16.6 | 58.8 | 0.24 | 3.27 | 0.00 | 0.86 | 0.00 |
| Cluster 317 | 20.0 | 17.1 | 59.1 | 0.19 | 2.47 | 0.22 | 0.67 | 0.22 |
| Cluster 318 | 23.5 | 12.8 | 59.7 | 0.16 | 3.21 | 0.16 | 0.32 | 0.16 |
| Cluster 319 | 22.5 | 14.8 | 58.9 | 0.00 | 3.53 | 0.00 | 0.22 | 0.00 |
| Cluster 320 | 21.3 | 14.8 | 60.2 | 0.00 | 3.68 | 0.12 | 0.00 | 0.00 |

**Table S2.**

Elemental composition of trace element enriched clusters within zircon (Figure 3D) in terms of atomic percent as determined by APT analysis.
